1 Genotyping and epidemiological metadata provides new insights into population  
2 structure of *Xanthomonas* isolated from walnut trees  
3  
4 Camila Fernandes,<sup>a,b,c</sup># Pedro Albuquerque,<sup>a,c\*</sup> Leonor Cruz,<sup>b,d</sup> Fernando Tavares<sup>a,c</sup>#  
5  
6 <sup>a</sup>CIBIO, Centro de Investigação em Biodiversidade e Recursos Genéticos, InBIO,  
7 Laboratório Associado, Universidade do Porto, Vairão, Portugal  
8  
9 <sup>b</sup>INIAV, Instituto Nacional de Investigação Agrária e Veterinária, Oeiras, Portugal  
10  
11 <sup>c</sup>FCUP, Faculdade de Ciências, Departamento de Biologia, Universidade do Porto,  
12 Porto, Portugal  
13  
14 <sup>d</sup>BioISI - Instituto de Biosistemas e Ciências Integrativas, Campus da FCUL, Campo  
15 Grande, Portugal  
16  
17 Running Head: New Insights into *Xanthomonas* Populations on Walnut  
18  
19 #Address correspondence to Camila Fernandes, [camila.fernandes@cibio.up.pt](mailto:camila.fernandes@cibio.up.pt), or  
20 Fernando Tavares, [ftavares@fc.up.pt](mailto:ftavares@fc.up.pt) .  
21  
22 \*Present address: Pedro Albuquerque, I3S - Instituto de Investigação e Inovação em  
23 Saúde, Universidade do Porto, Porto, Portugal.

20 **ABSTRACT**

21 *Xanthomonas arboricola* pv. *juglandis* (*Xaj*) is the etiological agent of walnut diseases  
22 affecting leaves, fruits, branches and trunks. Although this phytopathogen is widely  
23 spread in walnut producing regions and has a considerable genetic diversity, there is  
24 still a poor understanding of its epidemic behaviour. To shed some light on the  
25 epidemiology of these bacteria, 131 *Xanthomonas* isolates obtained from 64 walnut  
26 trees were included in this study considering epidemiological metadata such as year of  
27 isolation, bioclimatic regions, walnut cultivars, production regimes, host walnut  
28 specimen and plant organs. Genetic diversity was assessed by multilocus sequence  
29 analysis (MLSA) and dot blot hybridization patterns obtained with nine *Xaj*-specific  
30 DNA markers (XAJ1 – XAJ9). The results showed that *Xanthomonas* isolates grouped  
31 in ten distinct MLSA clusters and in 18 hybridization patterns (HP). The majority of  
32 isolates (112 out of 131) were closely related with *X. arboricola* strains of pathovar  
33 *juglandis* as revealed by MLSA (clusters I to VI) and hybridize with more than five *Xaj*-  
34 specific markers. Nineteen isolates clustered in four MLSA groups (clusters VII to X)  
35 which do not include *Xaj* strains, and hybridize to less than five markers. Taking this  
36 data together, was possible to distinguish 17 lineages of *Xaj*, three lineages of *X.*  
37 *arboricola* and 11 lineages of *Xanthomonas* sp. Some *Xaj* lineages appeared to be  
38 widely distributed and prevalent across the different bioclimatic regions and apparently  
39 not constrained by the other features considered. Assessment of type III effector genes  
40 and pathogenicity tests revealed that representative lineages of MLSA clusters VII to X  
41 were nonpathogenic on walnut, with exception for strain CPBF 424, making this  
42 bacterium particularly appealing to address *Xanthomonas* pathoadaptations to walnut.  
43

44 **IMPORTANCE** *Xanthomonas arboricola* pv. *juglandis* is one of the most serious  
45 threats of walnut trees. New disease epidemics caused by this phytopathogen has been a  
46 big concern causing high economic losses on walnut production worldwide. Using a  
47 comprehensive sampling methodology to disclose the diversity of walnut infective  
48 *Xanthomonas*, we were able to identify a genetic diversity higher than previously  
49 reported and generally independent of bioclimatic regions and the other epidemiological  
50 features studied. Furthermore, co-colonization of the same plant sample by distinct  
51 *Xanthomonas* strains were frequent and suggested a sympatric lifestyle. The extensive  
52 sampling carried out resulted in a set of non-*arboricola* *Xanthomonas* sp. strains,  
53 including a pathogenic strain, therefore diverging from the nonpathogenic phenotype  
54 that have been associated to these atypical strains, generally considered to be  
55 commensal. This new strain might be particularly informative to elucidate novel  
56 pathogenicity traits and unveil pathogenesis evolution within walnut infective  
57 xanthomonads. Beyond extending the present knowledge about walnut infective  
58 xanthomonads, this study might contribute to provide a methodological framework for  
59 phytopathogen epidemiological studies, still largely disregarded.

60

## 61 **Introduction.**

62 *Xanthomonas* is a gammaproteobacteria genus belonging to Xanthomonaceae,  
63 which includes soil dwelling bacteria and important phytopathogenic species, often  
64 composed of several host-specific pathovars (1, 2). *X. arboricola* pv. *juglandis* (*Xaj*) is  
65 the only xanthomonads described as a pathogen on walnut trees, acknowledged as the  
66 etiological agent of walnut pathologies known as the “Walnut Bacterial Blight (WBB);  
67 the “Brown Apical Necrosis” (BAN); and the “Vertical Oozing Canker” (VOC), all  
68 causing considerable economic losses (3-6). *Xaj* is frequently isolated from

69 symptomatic walnut leaves and fruits, but also from other walnut plant organs without  
70 apparent visible lesions, namely dormant walnut buds and catkins (7, 8), and from non-  
71 plant materials, such as orchard machinery (9). This pathogen has a cosmopolitan  
72 distribution and diseased trees are commonly observed throughout walnut-growing  
73 regions (10, 11). Genotyping studies have found a considerable genetic diversity in *Xaj*,  
74 which is reportedly high when compared with the diversity described for other *X.*  
75 *arboricola* pathovars (5, 11-14). This feature, together with evidence of genomic trade-  
76 offs within the species (5, 13, 15, 16), evokes an opportunistic pathogen, even though  
77 evidence for environmental reservoirs of *Xaj* remains poorly characterized (11, 17-19).  
78 These data are further supported by the isolation of nonpathogenic strains of *X.*  
79 *arboricola*, described as phylogenetically heterogeneous, and grouping separately from  
80 the well-defined clusters of pathogenic *Xaj* strains (20). Assessment of *Xaj* in France  
81 (5), Serbia (21) and Italy (9) showed large genetic diversity among isolates and  
82 proposed the existence of diverse *Xaj* populations. Furthermore, the genetic differences  
83 found between *Xaj* strains collected from VOC and WBB symptoms, suggests the  
84 presence of distinct genetic lineages within *Xaj* populations (5).

85         Different factors have been hypothesized to explain *Xaj* population diversity,  
86 namely geographical location (12, 22); origin of plant propagation material (5, 9);  
87 adaptation to particular environmental conditions (22, 23); genome flexibility or  
88 pathogen virulence (21-23); or even selective pressure by the host plant (5, 24).  
89 Regardless their valuable contributions, these studies were either based on a low  
90 number of bacterial isolates, often obtained without a planned sampling strategy, or  
91 based on a set of *Xaj* strains from worldwide collections, overlooking important  
92 metadata such as date, plant host traits, and climatic features which are essential to  
93 determine epidemiological patterns (25, 26). In fact, to understand the epidemiological

94 behaviour of *Xaj*, it is of utmost importance to conciliate in a single study  
95 comprehensive genotyping analysis of a coherent set of isolates with insightful  
96 metadata.

97 This study aimed to characterize the genetic diversity of xanthomonads isolates  
98 obtained from walnut trees over a three-year period, across distinct bioclimatic regions  
99 and taking into account different walnut cultivars, production regimes (orchards vs.  
100 isolated trees), host walnut tree and plant organs. Multilocus sequence analysis (MLSA)  
101 and dot blot hybridization patterns of nine *Xaj*-specific markers (27), were used to  
102 determine the genetic diversity of isolates. These data were complemented by  
103 monitoring the presence/absence of four informative type III effector genes (T3E)  
104 observed to differentiate non-pathogenic and pathogenic *Xaj* clusters (20) and by  
105 pathogenicity tests of representative lineages. Altogether, this research contributes to  
106 better elucidate the impact of environmental factors and host features on bacterial  
107 population diversity, which is important to improve phytosanitary control of diseases  
108 caused by walnut pathogenic *Xanthomonas*. Furthermore, we believe that the current  
109 study provides a methodological framework to address epidemiological studies of  
110 phytopathogens.

111

## 112 **Results.**

### 113 **Bacterial isolates obtained from walnut trees.**

114 A total of 131 isolates displaying yellow-pigmented colonies typical of  
115 *Xanthomonas* species were obtained. The majority of isolates were collected from  
116 symptomatic plant material (94%, 122/131), mostly from leaf samples (97 isolates,  
117 74%), whereas nine (6%, 9/131) isolates were obtained from asymptomatic plant organs  
118 (Table 1). More than one isolate was recovered from 38 trees, either from the same

119 sampling occurrence (i.e. the same plant in the same date) or from the same walnut tree  
120 at different sampling dates (Table 1).

121

122 **MLSA revealed that *Xanthomonas* walnut isolates were grouped into ten distinct**  
123 **clusters.**

124 The MLSA clustering data showed a clear separation, supported by high  
125 bootstrap values of 99%, between the 131 isolates and strains representatives of  
126 different *Xanthomonas* species, namely *X. albilineans*, *X. alfalfae*, *X. axonopodis*, *X.*  
127 *sacchari*, *X. campestris*, *X. cassavae*, *X. citri*, *X. euvesicatoria*, *X. floridensis*, *X.*  
128 *fragariae*, *X. fuscans*, *X. gardneri*, *X. hortorum*, *X. oryzae*, *X. perforans*, *X. prunicola*,  
129 *X. translucens*, *X. vasicola*. Even so, all CPBF isolates were assigned into the genus  
130 *Xanthomonas* and were clustered in ten different groups (Clusters I to X, Fig. 1). Most  
131 isolates (85.5%, 112/131) were grouped in clusters I to VI together with strains of *X.*  
132 *arboricola* pv. *juglandis* and other closely related strains belonging to pathovars *pruni*  
133 and *corylina*. The other 19 (14,5%, 19/131) isolates belong to clusters VII to X. Isolates  
134 from clusters VII and VIII were closely related with *X. arboricola* CFBP 7634 and *X.*  
135 *arboricola* CFBP 7651, previously described as nonpathogenic strains by Essakhi et al.  
136 (20); with *X. arboricola* CITA 124, *X. arboricola* CITA 44 and *X. arboricola* CITA 14,  
137 previously described as avirulent strains by Garita-Cambronero et al. (28, 29) and with  
138 strain NCPPB 1630 belonging to the poorly characterized pathovar *celebensis* (30) and  
139 *X. arboricola* 3004 isolated from barley and with uncertain pathogenicity (31). Isolates  
140 of groups IX and X formed two different clusters (bootstrap values > 95%) distant from  
141 the other isolates and strains of *X. arboricola* (Fig. 1). Cluster IX is composed of six  
142 isolates (CPBF 98, CPBF 105, CPBF 108, CPBF 1508, CPBF 1514, CPBF 1522)  
143 showing identical MLSA concatenated sequences, whereas considerable nucleotide

144 differences were observed among seven (CPBF 75, CPBF 78, CPBF 268, CPBF 424,  
145 CPBF 426, CPBF 606, CPBF 1488) of the nine isolates grouped into cluster X.

146

#### 147 **Diversity of isolates assessed using *Xaj* specific DNA markers.**

148 A total of 18 different hybridization patterns (HP), identified for the nine *Xaj* specific  
149 markers (XAJ1 to XAJ9) were obtained for the 131 isolates (Fig. 1 and Fig. 2). The  
150 most representative HP was HP10, identified in 38 isolates (29%, 38/131). The less  
151 frequent HPs were HP14, HP15 and HP19, only identified in one isolate each, followed  
152 by HP6, HP11, HP16, HP17, HP18 found in less than five isolates (Fig. 1). Among  
153 these, HP16 (CPBF 1515, CPBF 1586 and CPBF 1530), HP17 (CPBF 268 and CPBF  
154 424) and HP18 (CPBF 414 and CPBF 367) correspond to hybridization patterns limited  
155 to a single marker, XAJ9, XAJ2 and XAJ1, respectively. Six isolates out of 131 isolates  
156 (CPBF 75, CPBF 78, CPBF 122, CPBF 426, CPBF 606 and CPBF 1488) provided  
157 negative hybridization results for all markers (pattern HP0, Fig. 1 and Fig. 2).

158

#### 159 **Dot blot and MLSA data allowed to distinguish 31 xanthomonads lineages**

160 Patterns characterized by hybridization to three or less markers (HP0, HP14,  
161 HP16, HP17 and HP18, Fig. 2) were exclusive to strains of MLSA clusters VII to X  
162 (Fig. 1). On the other hand, strains belonging to MLSA groups I, II and III hybridized to  
163 seven or more markers (HP1, HP2, HP3, HP4, HP13, HP19, Fig. 1 and Fig. 2), except  
164 for five strains belonging to MLSA group I which hybridize to five markers (HP9, Fig.  
165 1 and Fig. 2).

166 For the 131 isolates obtained in this work, a total of 20 unique concatenated  
167 sequences were obtained with 403 polymorphisms in 199 nucleotide sites, taking into  
168 account MLSA data, and 18 different hybridization patterns were obtained by dot blot

169 assays. The added discrimination of the dot blot analysis, based on the presence/absence  
170 of specific loci, allowed the following group subdivisions: Group I with five distinct  
171 clonal lineages, Group II with two lineages, Group III with three lineages, Group IV  
172 with no subdivisions (one lineage), Group V with two lineages, Group VI with four  
173 lineages, Group VIII with two lineages, Group IX with three lineages and Group X with  
174 eight lineages. Group VII comprised only one strain (one lineage). In total, the  
175 compilation of data from the two genotyping strategies allowed distinguishing 31  
176 lineages within the xanthomonads populations found in walnut trees (Table 1). Lineages  
177 1 to 17 were represented by *Xaj* isolates, lineages 18 to 20 were represented by *X.*  
178 *arboricola* isolates and lineages 21 to 31 were represented by *Xanthomonas* sp. isolates.

179       Eight distinct genetic lineages (Lin1, Lin3, Lin7, Lin9, Lin11, Lin12, Lin14 and  
180 Lin21) were found across the 14 geographic locations of Portugal analysed in this study.  
181 The same lineage was found in locations characterized by distinct thermoclimatic  
182 regions according Rivas-Martínez (32): e.g. Lin1, Cluster I/HP1, was found in Ponte de  
183 Lima, a mesotemperature region; in Carrazeda de Ansiães, a mesomediterranean region;  
184 in Alcobaça, a supramediterranean region; and in Azeitão, a thermomediterranean  
185 region. Twenty lineages (Lin2, Lin4, Lin8, Lin10, Lin13, Lin15, Lin16, Lin18, Lin19,  
186 Lin20, Lin22, Lin23, Lin24, Lin25, Lin26, Lin27, Lin28, Lin29, Lin30, and Lin31)  
187 were represented by one or two isolates. Additionally, isolates belong to lineages Lin6  
188 (cluster II/HP2) and Lin17 (cluster VI/HP8) were restricted to one specific geographic  
189 location (Alcobaça) and Lin5 (cluster I/HP9) was only found in the mesomediterranean  
190 interior region of Portugal (Seia and Carrazeda de Ansiães locations). Moreover, five  
191 lineages were always found in geographic locations where walnut trees were sampled in  
192 consecutive years (Lin9 and Lin12 in Alcobaça, Lin1 and Lin12 in Azeitão and Lin14 in  
193 Loures). None of the most representative lineages were associated with specific plant



194 organs, except for lineage Lin6 represented by six isolates only found in leaves, or with  
195 specific *J. regia* cultivars.

196

### 197 **Isolates with distinct genotypes colonize the same organ of walnut trees**

198 From the 64 trees analysed in this work, more than one isolate was retrieved  
199 from 37 trees sampled at the same date (Table 1, Jr#01, Jr#02, Jr#03, Jr#05, Jr#07,  
200 Jr#08, Jr#11, Jr#18, Jr#23, Jr#25, Jr#26, Jr#27, Jr#28, Jr#30, Jr#32, Jr#35, Jr#36, Jr#37,  
201 Jr#38, Jr#41, Jr#44, Jr#46, Jr#47, Jr#49, Jr#50, Jr#52, Jr#53, Jr#54, Jr#56, Jr#57, Jr#58,  
202 Jr#59, Jr#60, Jr#61, Jr#62, Jr#63 and Jr#64). From these, five trees allowed to recover  
203 only one genetic lineage, as defined using MLSA and HP data (Jr#05, cluster VI/HP8,  
204 Lin17; Jr#07, I/HP4, Lin9; Jr#11, I/HP9, Lin5; Jr#44, IV/HP10, Lin11; Jr#47, I/HP9,  
205 Lin5), while 32 trees allowed to discern two or more distinct bacterial lineages from a  
206 single sampling event, with the majority of isolates being obtained from the same leaf  
207 samples of walnut trees (22 trees: Jr#26, Jr#27, Jr#28, Jr#32, Jr#36, Jr#37, Jr#38, Jr#46,  
208 Jr#49, Jr#50, Jr#52, Jr#53, Jr#54, Jr#56, Jr#57, Jr#58, Jr#59, Jr#60, Jr#61, Jr#62, Jr#63,  
209 Jr#64, Fig. 3). Interestingly, all six trees that were analysed in consecutive years (Jr#01,  
210 Jr#03, Jr#06, Jr#18, Jr#26, Jr#27), consistently allowed recovering different lineages  
211 (Table 1 and Fig. 1).

212

### 213 **Assessment of type III effector genes (*xopR*, *avrbs2*, *xopF1* and *xopN*), revealed**

#### 214 ***Xanthomonas* isolates with new T3E profiles**

215 The presence of T3E genes (*xopR*, *avrbs2*, *xopF1* and *xopN*) was assessed on  
216 representative isolates of each main cluster constituted by *Xaj* isolates (clusters I to VI)  
217 and on all *X. arboricola* isolates belonging to clusters VII and VIII and *Xanthomonas*  
218 sp. from cluster IX and X (Fig. 1 and Fig. S1). Among CPBF *Xaj* isolates belonging to

219 clusters I to VI, positive hybridization dots were obtained for all four T3E genes  
220 studied. *xopN* was not detected in all the 19 isolates belonging to MLSA clusters VII,  
221 VIII, IX and X. Ten of these isolates, belonged to clusters VII, VII and IX, and  
222 hybridized with *xopR*, *avrBs2* and *xopF1* specific probes. Two isolates of cluster X  
223 (CPBF 78 and CPBF 424) hybridized with *xopR* and *xopF1* and the remaining seven  
224 isolates of cluster X only hybridized with *xopR* gene (Fig. 4).

225 The T3E gene patterns obtained for the 35 isolates assayed could be correlated  
226 with data previously reported by Essakhi et al. (20), with exception of two isolates  
227 (CPBF 78 and CPBF 424), which presented a novel profile of T3E genes (Fig. 4).

228

### 229 ***Non-arboricola Xanthomonas* isolate can cause bacterial leaf spots on walnut**

230 Pathogenicity assays were conducted in order to verify the ability of  
231 *Xanthomonas* sp. isolates with distinct T3Es (CPBF 1514, CPBF 424, CPBF 75, CPBF  
232 367 and CPBF 1488) to cause typical disease symptoms on *Juglans regia*. Seven days  
233 after inoculation of strain LMG 747, bacterial necrotic spots were observed on leaves of  
234 walnut plantlets. Similar symptoms were detected for *Xaj* isolate CPBF 1480 and for the  
235 non-*arboricola Xanthomonas* isolate CPBF 424 (Fig. 5). No symptoms were observed  
236 using *Xanthomonas* sp. isolates CPBF 1514, CPBF 75, CPBF 367 and CPBF 1488 (data  
237 not shown), suggesting they are nonpathogenic on walnut trees. Re-isolation of yellow  
238 mucoid bacterial colonies followed by sequencing analysis of two genes (*gyrB* and *fyuA*  
239 partial sequences) confirmed that the two isolates (CPBF 1480, a *Xaj* isolate and CPBF  
240 424, *Xanthomonas* sp. isolate) are pathogenic on *Juglans regia* (data not shown).

241

### 242 **Discussion.**

243 Walnut tree is acknowledged as a host plant species for *X. arboricola* providing  
244 a permanent niche for the pathovar *juglandis*, which are walnut pathogens characterized  
245 by a high genetic diversity (5, 9, 12, 21-24). Regardless these contributions, most of  
246 these studies were based either on established collections of strains, or on a limited  
247 number of field isolates apparently obtained through a random sampling strategy. To  
248 comprehensively characterize the diversity of *Xanthomonas* walnut pathogens, and fully  
249 understand the epidemic dynamics of these bacteria, the present research followed a  
250 sampling plan taking into account metadata thought to influence disease epidemiology,  
251 namely different walnut cultivars, production regimes (orchards vs. isolated trees),  
252 walnut tree specimen, plant organs and distinct bioclimatic regions, over a three-year  
253 period.

254 Portugal is a walnut production country characterized by distinct bioclimatic  
255 regions and a long historical record of WBB disease symptoms. The first scientific  
256 evidence for walnuts infected with *Xaj* date back to 1935 (33). The authors mentioned  
257 that high humidity favoured the infection and suggested that both environmental and  
258 meteorological conditions could influence disease development (33). Currently, WBB  
259 disease is commonly observed in walnut Portuguese orchards and in dispersed walnut  
260 trees across the country, affecting crop yield drastically. Although is acknowledged that  
261 *Xaj* is the main pathogenic agent of walnut diseases all over the country, information  
262 about genetic diversity of this pathogen, its dissemination and epidemiology remain  
263 unknown, impairing the implementation of scientifically informed phytosanitary  
264 measures. In this work, a total of 131 isolates were obtained from diseased walnut trees  
265 between 2014 to 2016 following a planned sampling strategy. Isolates were collected  
266 from distinct plant organs (leaves, fruits, branches, buds and catkins) of different  
267 cultivars of walnut trees mainly located in geographic regions with high walnut

268 production and characterized by distinct bioclimatic conditions and different  
269 management strategies.

270 Isolates diversity was assessed by MLSA considering four housekeeping genes  
271 (*acnB*, *fyuA*, *gyrB* and *rpoD*), following an approach previously used to determine the  
272 phylogeny of *Xanthomonas* spp. (34, 35). In fact, the large number of sequences  
273 available at the GenBank database, the discriminatory power of each of these  
274 housekeeping genes and its wide utilization in transversal studies on *Xaj* (9, 21, 23, 24),  
275 makes MLSA a suitable method to carry out detailed comparisons with other studies.  
276 Furthermore, MLSA has been particularly useful for differentiating *X. arboricola*  
277 isolates obtained from the same host plant (20, 28, 29). In this study, ten different  
278 MLSA clusters were defined (I to X, Fig.2) with most of the isolates being distributed in  
279 clusters I to VI, which also contained several fully sequenced *Xaj* strains, namely *Xaj*  
280 417 (36); NCPPB 1447; CFBP 2528 and CFBP 7179 (37); CFSAN033077-89 (38). The  
281 remaining isolates, clustered in groups VII to X (Fig. 2), were clearly distinguishable  
282 from the main *Xaj* MLSA clusters. Clusters VII and VIII, closely related to other *X.*  
283 *arboricola*, as non-pathogenic or avirulent strains (20, 28, 29), comprise isolates belong  
284 to the species *X. arboricola* isolated from symptomatic leaves. Cluster IX and X were  
285 grouped outside any other cluster defined by *X. arboricola*. Cluster IX is formed by a  
286 single clonal complex of six *Xanthomonas* sp. isolated from symptomatic leaves and  
287 cluster X is the group of *Xanthomonas* sp. mainly isolated from asymptomatic material  
288 (bud and catkin samples) showing the highest genetic variation. To further elucidate the  
289 genetic diversity of all 131 isolates, dot blot hybridization assays using *Xaj*-specific  
290 DNA markers XAJ1 to XAJ9 (27), allowed to identify eighteen distinct hybridization  
291 patterns (Fig. 2), and distinguish isolates within the same MLSA cluster (Fig. 1).  
292 Particularly, isolates from MLSA cluster I, which included 29 isolates, were divided

293 into four sub-groups when hybridization patterns were considered. The genotyping  
294 appraisal of a considerable number of isolates confirm the utility of these markers for  
295 the identification of different *Xaj* lineages, as suggested previously (27). Furthermore,  
296 these molecular markers have shown to be useful as genetic tools on the  
297 characterization of all xanthomonads population found on walnut trees. Although a  
298 perfect match between specific hybridization patterns and MLSA groups was not  
299 observed, it was clear that all the HPs corresponding to none (HP0) or a single positive  
300 *Xaj* specific markers (HP16, HP17, HP18) were correlated with more divergent MLSA  
301 groups composed by *X. arboricola* and *Xanthomonas* sp. isolates. Moreover, when  
302 MLSA and dot-blot hybridization patterns were combined, it was possible to enhance  
303 the genotyping resolution and disclose at least 31 divergent *Xanthomonas* lineages,  
304 including 17 lineages of *Xaj*, three lineages of *X. arboricola*, 11 lineages of  
305 *Xanthomonas* sp., among the 131 isolates associated with walnut trees.

306         Several important walnut production regions were included in this study, taking  
307 into consideration distinct bioclimatic conditions and different culture practices, namely  
308 Trás-os-Montes (e.g. Carrazeda de Ansiães location) with intensive summer drought  
309 and winter severity, i.e. mesomediterranean bioclimatic region, characterized by a  
310 walnut production largely based on isolated walnut trees; Alentejo (e.g. Beja and  
311 Estremoz locations) dominated by regularly warm temperatures and dry climate, i.e.  
312 supramediterranean bioclimatic region; and Minho (e.g. Ponte da Barca and Ponte de  
313 Lima) with high annual precipitation and relatively mild summers, i.e. mesotemperature  
314 bioclimatic region, both major walnut producing areas in Portugal characterized by  
315 orchards planted with selected *Juglans regia* cultivars. Although bioclimatic features  
316 and culture practices have been suggested to influence not only the epidemiology and  
317 prevalence of walnut disease, but also the bacterial population structure (9, 22, 23), our

318 data show that some *Xanthomonas* lineages were not constrained by bioclimatic  
319 pressures and management strategies. In fact, *Xaj* lineages 1, 9, 12, and 14 appeared to  
320 be the most prevalent over time and uncover a widespread distribution in Portugal. On  
321 the other hand, some *Xaj* lineages were shown to have a narrower distribution, despite  
322 the exhaustive sampling effort (Lin6 and Lin17 specific to Alcobaca location; and Lin5  
323 exclusively found in mesomediterranean bioclimatic region). These lineages could not  
324 be detected in other regions either because they are underrepresented in comparison  
325 with other prevalent *Xanthomonas* lineages, or because these clonal lineages are  
326 particularly adapted to specific ecological conditions. Future sampling efforts will be  
327 essential to track these lineages to determine their prevalence and to identify possible  
328 lineage specific adaptation traits. Moreover, seven lineages of *Xaj* (Lin2, Lin4, Lin8,  
329 Lin10, Lin13, Lin15, Lin16) and the majority of *X. arboricola* and *Xanthomonas sp.*  
330 genetic lineages described in this study (13/14 lineages – Lin18, Lin19, Lin20, Lin22,  
331 Lin23, Lin24, Lin25, Lin26, Lin27, Lin28, Lin29, Lin30, and Lin31) showed to be  
332 occasional, being the less frequent lineages.

333         Beyond the bioclimatic and geographic variables, host specific attributes namely  
334 organs of walnut trees, e.g. leaves, fruits, and trunks are expected to constitute distinct  
335 selective pressures which might favour the emergence of distinct *Xaj* lineages as  
336 previously reported (5, 24). Some studies hypothesized that genomic plasticity of *Xaj*  
337 confers a high adaptation to very different environmental niches namely through the  
338 gain of additional features which might have led to *Xaj* lineages as the one that have  
339 been associated with VOC disease (5). Furthermore, the same tree could be infected  
340 simultaneously by different *Xaj* strains, causing distinct symptoms (WBB, BAN and  
341 VOC) (5, 39). In the present study, we show that the diversity of bacterial  
342 xanthomonads found on walnut trees is more complex than originally thought, being

343 characterized by distinct lineages of *Xaj*, *X. arboricola* and *Xanthomonas sp.* found to  
344 co-colonize the same walnut organ sample. Furthermore, we gathered evidence  
345 suggesting that co-colonization is not occasional, since was found in 32 of our 64  
346 walnut trees sampled as shown by the coexistence of different *Xaj* lineages and *Xaj*  
347 lineages with *Xanthomonas sp.* lineages infecting leaves of the same walnut tree (Fig.  
348 3). Interestingly, some *Xaj* lineages appeared strongly associated, as in the case of Lin1  
349 frequently isolated with Lin12, and Lin6 recovered simultaneously with Lin11 in all leaf  
350 samples. Although, further investigations are important to determine if the  
351 xanthomonads diversity within the same walnut host plant and even within the same  
352 plant organ, is a mix of bacterial populations colonizing evenly the same host plant and  
353 organ, or if it results from the co-colonization of dominant versus lessened  
354 xanthomonads populations, it was recently proposed that sympatric populations, as  
355 pathogenic and nonpathogenic strains found together on walnut buds, may have  
356 important effects on genetic dynamics of new strains emergence (16, 20).

357         It is currently acknowledged that functional T3E have been pointed out as  
358 essential for pathogenicity in *X. arboricola* (20, 28, 29, 37). In fact, noninfective *X.*  
359 *arboricola* strains were characterized by the absence of genes encoding for some type  
360 III effectors proteins (T3Es) (15, 20, 28). When studying the presence of the T3Es genes  
361 *xopR*, *avrBs2*, *xopF1* and *xopN*, suitable to distinguish three groups of nonpathogenic  
362 strains (NP1, NP2, and NP3) according Essakhi et al. (20), we could assign most of the  
363 19 isolates evaluated from cluster VII to X to nonpathogenic groups NP2 and NP3, with  
364 exception for two isolates (CPBF 78 and CPBF 424) which displayed a new pattern of  
365 T3E genes (presence of *xopR* and *xopF1*; absence of *avrbs2* and *xopN*) (Fig. 4).  
366 Moreover, when the pathogenicity of isolates with distinct composition of T3Es was  
367 assessed on leaves of walnut plantlets (CPBF 75, CPBF 367, CPBF 424, CPBF 1488,

368 CPBF 1514), only strain CPBF 424, which was obtained from walnut buds, induced  
369 symptoms on their host of isolation. This result is particularly relevant and raise  
370 questions about the genomic virulence features of this *Xanthomonas* sp. strain (CPBF  
371 424) on walnut trees and could be particular important for disclosing genome dynamics  
372 and for pathogenicity emergence of *X. arboricola*.

373 In conclusion, this study analysed the distribution of *Xaj* genetic diversity in  
374 Portugal, which consisted in extensive surveys conducted for three consecutive years, in  
375 distinct walnut producing regions characterized by diverse bioclimatic regions and  
376 different walnut production practices. Comprehensive genotyping analyses allowed to  
377 identify the most prevalent *Xaj* lineages, the possible emergence of new *Xaj* lineages  
378 and disclose non-infective *X. arboricola* strains and a non-*arboricola* pathogenic  
379 *Xanthomonas* sp., which might provide new insights to elucidate new *Xanthomonas*  
380 pathoadaptations.

381

## 382 **Materials and Methods.**

### 383 **Bacterial isolation from different walnut plant organs.**

384 A total of 94 walnut plant samples were collected from different plant organs  
385 (66 leaves, 17 fruits, four branches, six buds and one catkins) of 64 symptomatic walnut  
386 trees (*Juglans regia*) distributed throughout Portugal. Sampling were done in 14  
387 geographic locations along four bioclimatic regions, characterized by distinct  
388 thermoclimatic parameters (32): mesotemperature - Mt (Ponte da Barca and Ponte de  
389 Lima locations), mesomediterranean - Mm (Carrazeda de Ansiães, Baião, Guarda and  
390 Seia locations), supramediterranean - Sm (Alcobaça, Beja, Bombarral, Estremoz, Leiria  
391 and Loures locations) and thermomediterranean - Tm (Azeitão and Portimão locations).



392 Sampled walnuts were either isolated trees or walnut hosts found in orchards  
393 established with different French, American or/and Portuguese walnut cultivars,  
394 including F1 hybrids (Table 1). Sampling occurred between April and October (Leaves  
395 from June to October; Fruits from June to September; Branches in June and July;  
396 Catkins in September; Buds in April and September). Apart from one sample collected  
397 in 2009, all trees were sampled between 2014 and 2016, with the trees Jr#01, Jr#03,  
398 Jr#06, Jr#18, Jr#26 and Jr#27 being sampled in different years (Table 1). Necrotic  
399 lesions characteristic of WBB or BAN symptoms were observed in all leaves, fruits and  
400 branches sampled, and all buds and catkins samples collected were asymptomatic.  
401 Multiple samples of different organs were also collected at the same sampling date from  
402 the walnut trees Jr#02, Jr#03, Jr#05, Jr#07, Jr#08, Jr#11, Jr#18, Jr#25, Jr#26, Jr#27,  
403 Jr#30, Jr#35, Jr#47 and Jr#56 (Table 1).

404 Sample preparation for bacterial isolation was carried out differently for  
405 symptomatic and asymptomatic material: i) for symptomatic leaves, fruits and branches,  
406 plant tissues adjacent to necrotic areas were first excised using a sterile scalpel; ii) for  
407 asymptomatic buds and catkins, either single terminal buds, axillary bud groups or  
408 catkins groups of the same branch were excised also using a sterile scalpel according  
409 sampling procedures previously described (7, 8). Bacterial isolation was carried out as  
410 procedure detailed in Fernandes et al. (27). One to three isolates were selected per  
411 sample and stored at -80°C at the Portuguese Collection of Phytopathogenic Bacteria  
412 (CPBF - Coleção Portuguesa de Bactérias Fitopatogénicas, Oeiras, Portugal).

413

#### 414 **Growth conditions of bacterial pure cultures and DNA extraction.**

415 The whole set of xanthomonads walnut isolates (Table 1) and *X. arboricola*  
416 strains used in this work were cultured at 28°C on YGC medium (5 g liter<sup>-1</sup> yeast

417 extract, 10 g liter<sup>-1</sup> glucose, 30 g liter<sup>-1</sup> CaCO<sub>3</sub>, 15 g liter<sup>-1</sup> agar). Genomic DNA from  
418 pure bacterial cultures was extracted using the EZNA Bacterial DNA Purification kit  
419 (Omega Bio-Tek, Norcross, GA), following the manufacturer's instructions, and  
420 quantified using the Qubit 2.0 Fluorometer HS Assay (Invitrogen, Carlsbad, CA).  
421

#### 422 **Multilocus sequence analysis and dot blot hybridization.**

423 Multilocus sequence analysis (MLSA) was carried out using the concatenated  
424 sequences of four housekeeping gene fragments: *acnB* (aconitase), *fyuA* (tonB-  
425 dependent receptor), *gyrB* (DNA gyrase subunit B) and *rpoD* (RNA polymerase sigma  
426 factor). Primer pairs used for *acnB* amplification (684 bp) were described by Parkinson  
427 et al. (34) and for *fyuA* (724 bp), *gyrB* (904 bp) and *rpoD* (915 bp) by Young et al. (35).  
428 The PCR reaction mixture (total volume of 40 µL) contained 1X DreamTaq Buffer with  
429 2.0 mM MgCl<sub>2</sub> (Fermentas, Ontario, Canada), 0.2 mM of each dNTP (Fermentas), 0.2  
430 µM of each forward and reverse primers, 1U of DreamTaq DNA Polymerase  
431 (Fermentas) and 25 ng of bacterial DNA. PCR conditions for the four genes, were 95°C  
432 for 5 min, followed by 30 cycles of 95°C for 30 s, 54°C for 30 s, 72°C for 45 s, and a  
433 final extension step of 72°C for 10 min. PCR products were purified using the illustra  
434 GFX GEL Band Purification kit (GE Healthcare, Buckingham-shire, United Kingdom),  
435 according to the manufacturer's instructions, and sequenced on both strands (STAB  
436 Vida, Caparica, Portugal). Consensus nucleotide sequences obtained for each gene  
437 fragments were aligned, trimmed and concatenated using the Geneious v. 9.1.7 software  
438 (Biomatters, Auckland, New Zealand). The 131 concatenated sequences (513 bp of  
439 *acnB*, 640 bp of *fyuA*, 828 bp of *gyrB* and 793 bp of *rpoD*) obtained from the  
440 Portuguese isolates were used to build a Maximum Likelihood tree based on the  
441 General Time Reversible (GTR+G+I) model in MEGA 7.0 (40). To account for the

442 known *Xanthomonas* genomic diversity, 32 additional *X. arboricola* strains were  
443 included in the analysis together with 89 *Xanthomonas* spp. strains, for which all *acnB*,  
444 *fyuA*, *gyrB* and *rpoD* sequences were available in the GenBank database.

445         Dot blot assays were performed as described in a previous study using nine *Xaj*  
446 specific DNA markers (XAJ1 to XAJ9) (27). Briefly, 100 ng of bacterial DNA were  
447 bound to a nylon hybridization transfer membrane (Roche Diagnostics GmbH, Basel,  
448 Switzerland) using a Bio-Dot microfiltration unit (Bio-Rad, Hercules, CA).  
449 Hybridization was carried out overnight at 68°C to ensure high stringency, with each of  
450 the nine DIG-labelled probes (XAJ1 to XAJ9). Dot blot images were acquired using a  
451 Molecular Imager ChemiDoc system (Bio-Rad, Hercules, CA).

452

#### 453 **Type three effector genes assessed by dot blot assays.**

454         The presence of four type three effector genes (T3E), *xopR*, *avrBs2*, *xopF1* and  
455 *xopN*, was assessed by dot blot hybridization assays. Genes *xopR*, *avrBs2*, *xopF1* have  
456 been considered to be ubiquitous T3E in strains of *X. arboricola*, whereas *xopN* has  
457 been suggested to be normally associated with *X. arboricola* strains from pathovars  
458 *juglandis*, *pruni* and *corylina* (15). Moreover, the distribution of these T3Es genes have  
459 been referenced to differentiate pathogenic from nonpathogenic strains of *X. arboricola*  
460 isolated from walnut trees (20). PCR primers used for preparation of T3E DNA probes  
461 were previously described (15). Partial sequences of the four T3E genes were obtained  
462 for *Xaj* strain LMG 751 using the PCR reaction conditions described above. PCR  
463 amplifications were performed with one cycle of 5 min at 95°C, followed by 35 cycles  
464 of 35 s at 95°C, 60 s at 60°C, 60 s at 72°C and a final step of 10 min at 72°C. Each  
465 DNA amplicon obtained (303 bp of *xopR*, 850 bp of *avrBs2*, 779 bp of *xopF1* and 864  
466 bp of *xopN*) was purified with the illustra GFX GEL Band Purification kit, and

467 sequenced (STAB Vida) to confirm its identity. The DIG-High Prime kit (Roche  
468 Diagnostics GmbH, Basel, Switzerland) was used for probe labelling, following the  
469 reference protocol available and a final probe concentration of 100 ng/ml was used in  
470 dot blot assays performed as described above. In addition to the 35 walnut  
471 xanthomonads isolates, one nonpathogenic strain of *X. arboricola* (CFBP 1022) and  
472 three *Xaj* reference strains (CFBP 176, LMG 747 and LMG 751) were also included in  
473 each dot blot assay.

474

#### 475 **Pathogenicity assays.**

476 *Juglans regia* cv. Hartley seedlings were used for determination of pathogenicity  
477 of selected isolates. After 30 days of cold stratification treatment at 3-5°C to break  
478 dormancy, *Juglans regia* seeds were sown in sterilized sand substrate and germinated  
479 during 60 days at alternated temperatures, 16 hours day at 30°C and 8 hours night at  
480 20°C (41). Walnut plantlets were then maintained in a climatic chamber under  
481 controlled environmental conditions of 16-hour photoperiod (16 h of light at 24°C and 8  
482 h of darkness at 18°C).

483 Bacterial inoculations were performed when walnut plantlets had at least four  
484 young leaves fully expanded. Three plantlets were used for each isolate tested.  
485 Inoculum suspensions, prepared with sterile distilled water, were obtained from pure  
486 cultures grown on nutrient agar (NA) medium at  $28 \pm 2^\circ\text{C}$  for 48 h. Bacterial  
487 suspensions were adjusted to a concentration of approximately  $1 \times 10^8$  CFU ml<sup>-1</sup> and  
488 confirmation of bacterial inoculum concentration was carried out by plating serial  
489 decimal dilutions on NA medium, with viable cell counting made 48 h after incubation.  
490 Plantlets were inoculated by spraying with a manual atomizer until runoff and kept in  
491 closed polyethylene bags for 48 h to promote bacterial infection, under the same

492 temperatures and photoperiod conditions mentioned above. Plastic bags were then  
493 opened and plants maintained during four weeks for development of symptoms. Walnut  
494 plantlets sprayed with sterile distilled water were used as negative controls. Positive  
495 controls were performed by spraying a suspension of the reference type strain *Xaj* LMG  
496 747 and *Xaj* isolate CPBF 1480 using the same concentration of viable cells. In order to  
497 fulfil Koch's postulates, reisolation was performed from leaves presenting necrotic  
498 spots (42).

499

#### 500 **Accession number(s).**

501 GenBank accession numbers corresponding to *acnB*, *fyuA*, *gyrB* and *rpoD*  
502 sequences of xanthomonads isolates from walnut is available as supplemental material  
503 (Table S1).

504

#### 505 **Acknowledgments.**

506 This work was co-financed by the European Structural & Investment Funds (ESIFs)  
507 through the Operational Competitiveness and Internationalization Programme –  
508 COMPETE 2020 and by National Funds through FCT – Fundação para a Ciência e a  
509 Tecnologia, within the framework of the project EVOXANT (PTDC/BIA-  
510 EVF/3635/2014, POCI-01-0145-FEDER-016600). Camila Fernandes is supported by a  
511 fellowship from the FCT (SFRH/BD/95913/2013). The authors would like to thank the  
512 walnut producers who collaborated in this study, Lurdes Santos and Paulo Godinho for  
513 the work performed on walnut seedlings and Joaquim Trindade for taking the photos of  
514 pathogenicity results.

515

#### 516 **References.**

- 517 1. Rademaker JL, Louws FJ, Schultz MH, Rossbach U, Vauterin L, Swings J, de  
518 Bruijn FJ. 2005. A comprehensive species to strain taxonomic framework for  
519 *Xanthomonas*. *Phytopathology* 95:1098-111.
- 520 2. Vauterin L, Hoste B, Kersters K, Swings J. 1995. Reclassification of  
521 *Xanthomonas*. *Int J Syst Bacteriol* 45:472-489.
- 522 3. Pierce NB. 1901. Walnut bacteriosis. *Bot Gaz* 31:272-273.
- 523 4. Smith RE, Smith CO, Ramsey HJ. 1912. Walnut culture in California and  
524 walnut blight. *California Agricultural Experiments Station Bulletin* 231:119-  
525 398.
- 526 5. Hajri A, Meyer D, Delort F, Guillaumes J, Brin C, Manceau C. 2010.  
527 Identification of a genetic lineage within *Xanthomonas arboricola* pv. *juglandis*  
528 as the causal agent of vertical oozing canker of Persian (English) walnut in  
529 France. *Plant Pathol* 59:1014-1022.
- 530 6. Moragrega C, Matias J, Aleta N, Montesinos E, Rovira M. 2011. Apical necrosis  
531 and premature drop of Persian (English) walnut fruit caused by *Xanthomonas*  
532 *arboricola* pv. *juglandis*. *Plant Dis* 95:1565-1570.
- 533 7. Mulrean EN, Schroth MN. 1982. Ecology of *Xanthomonas campestris* pv.  
534 *juglandis* on Persian (English) walnuts. *Phytopathology* 72:434-438.
- 535 8. Lindow S, Olson W, Buchner R. 2014. Colonization of dormant walnut buds by  
536 *Xanthomonas arboricola* pv. *juglandis* is predictive of subsequent disease.  
537 *Phytopathology* 104:1163-1174.
- 538 9. Giovanardi D, Bonneau S, Gironde S, Fischer-Le Saux M, Manceau C, Stefani  
539 E. 2015. Morphological and genotypic features of *Xanthomonas arboricola* pv.  
540 *juglandis* populations from walnut groves in Romagna region, Italy. *Eur J Plant*  
541 *Pathol* 145:1-16.

- 542 10. Frutos D. 2010. Bacterial diseases of walnut and hazelnut and genetic resources.  
543 J Plant Pathol 92:S79-S85.
- 544 11. Lamichhane JR. 2014. *Xanthomonas arboricola* diseases of stone fruit, almond,  
545 and walnut trees: Progress toward understanding and management. Plant Dis  
546 98:1600-1610.
- 547 12. Loreti S, Gallelli A, Belisario A, Wajnberg E, Corazza L. 2001. Investigation of  
548 genomic variability of *Xanthomonas arboricola* pv. *juglandis* by AFLP analysis.  
549 Eur J Plant Pathol 107:583-591.
- 550 13. Barionovi D, Scortichini M. 2008. Integron variability in *Xanthomonas*  
551 *arboricola* pv. *juglandis* and *Xanthomonas arboricola* pv. *pruni* strains. FEMS -  
552 Microbiol Lett 288:19-24.
- 553 14. Saux MFL, Bonneau S, Essakhi S, Manceau C, Jacques MA. 2015. Aggressive  
554 emerging pathovars of *Xanthomonas arboricola* represent widespread epidemic  
555 clones distinct from poorly pathogenic strains, as revealed by multilocus  
556 sequence typing. Appl Environ Microbiol 81:4651-4668.
- 557 15. Hajri A, Pothier JF, Fischer-Le Saux M, Bonneau S, Poussier S, Boureau T,  
558 Duffy B, Manceau C. 2012. Type three effector gene distribution and sequence  
559 analysis provide new insights into the pathogenicity of plant-pathogenic  
560 *Xanthomonas arboricola*. Appl Environ Microbiol 78:371-84.
- 561 16. Merda D, Bonneau S, Guimbaud JF, Durand K, Brin C, Boureau T, Lemaire C,  
562 Jacques MA, Fischer-Le Saux M. 2016. Recombination-prone bacterial strains  
563 form a reservoir from which epidemic clones emerge in agroecosystems.  
564 Environ Microbiol Rep doi:10.1111/1758-2229.12397.
- 565 17. Esterio MA, Latorre BA. 1982. Potential sources of inoculum of *Xanthomonas*  
566 *juglandis* in walnut blight outbreaks. Journal of Horticultural Science 57:69-72.

- 567 18. Pruvost O, Gardan L. 1988. Dynamics of epiphytic survival of *Xanthomonas*  
568 *campestris* pathovar *corylina*, *Xanthomonas campestris* pathovar *juglandis*,  
569 *Erwinia herbicola* and *Pseudomonas paucimobilis* on hazelnut leaves.  
570 *Agronomie* 8:925-932.
- 571 19. Rudolph R. 1993. Infection of the plant by *Xanthomonas*, p 193-264. In Swings  
572 JG, Civerolo EL (ed), *Xanthomonas*, 1st ed, Chapman & Hall, London.
- 573 20. Essakhi S, Cesbron S, Fischer-Le Saux M, Bonneau S, Jacques M-A, Manceau  
574 C. 2015. Phylogenetic and variable-number tandem-repeat analyses identify  
575 nonpathogenic *Xanthomonas arboricola* lineages lacking the canonical Type III  
576 Secretion System. *Appl Environ Microbiol* 81:5395-5410.
- 577 21. Ivanovic Z, Popovic T, Janse J, Kojic M, Stankovic S, Gavrilovic V, Fira D.  
578 2014. Molecular assessment of genetic diversity of *Xanthomonas arboricola* pv.  
579 *juglandis* strains from Serbia by various DNA fingerprinting techniques. *Eur J*  
580 *Plant Pathol* 141:133-145.
- 581 22. Scortichini M, Marchesi U, Di Prospero P. 2001. Genetic diversity of  
582 *Xanthomonas arboricola* pv. *juglandis* (synonyms: *X. campestris* pv. *juglandis*;  
583 *X. juglandis* pv. *juglandis*) strains from different geographical areas shown by  
584 repetitive polymerase chain reaction genomic fingerprinting. *J Phytopathol*  
585 149:325-332.
- 586 23. Kaluzna M, Pulawska J, Waleron M, Sobiczewski P. 2014. The genetic  
587 characterization of *Xanthomonas arboricola* pv. *juglandis*, the causal agent of  
588 walnut blight in Poland. *Plant Pathol* 63:1404-1416.
- 589 24. Marcelletti S, Ferrante P, Scortichini M. 2010. Multilocus sequence typing  
590 reveals relevant genetic variation and different evolutionary dynamics among  
591 strains of *Xanthomonas arboricola* pv. *juglandis*. *Diversity* 2:1205-1222.



- 592 25. McMahon C, Denaxas S. 2016. A novel framework for assessing metadata  
593 quality in epidemiological and public health research settings. AMIA Jt Summits  
594 Transl Sci Proc 2016:199-208.
- 595 26. Parkhill J, Wren BW. 2011. Bacterial epidemiology and biology - lessons from  
596 genome sequencing. Genome Biol 12:230-230.
- 597 27. Fernandes C, Albuquerque P, Sousa R, Cruz L, Tavares F. 2017. Multiple DNA  
598 markers for identification of *Xanthomonas arboricola* pv. *juglandis* isolates and  
599 its direct detection in plant samples. Plant Dis 101:858-865.
- 600 28. Garita-Cambronero J, Palacio-Bielsa A, Lopez MM, Cubero J. 2017. Pan-  
601 genomic analysis permits differentiation of virulent and non-virulent strains of  
602 *Xanthomonas arboricola* that cohabit *Prunus* spp. and elucidate bacterial  
603 virulence factors. Front Microbiol 8:573.
- 604 29. Garita-Cambronero J, Palacio-Bielsa A, López MM, Cubero J. 2016. Draft  
605 genome sequence for virulent and avirulent strains of *Xanthomonas arboricola*  
606 isolated from *Prunus* spp. in Spain. Stand Genomic Sci 11:12.
- 607 30. Harrison J, Grant MR, Studholme DJ. 2016. Draft genome sequences of two  
608 Strains of *Xanthomonas arboricola* pv. *celebensis* isolated from banana plants.  
609 Genome Announc 4:e01705-15.
- 610 31. Ignatov AN, Kyrova EI, Vinogradova SV, Kamionskaya AM, Schaad NW,  
611 Luster DG. 2015. Draft genome sequence of *Xanthomonas arboricola* strain  
612 3004, a causal agent of bacterial disease on barley. Genome Announc 3:e01572-  
613 14.
- 614 32. Rivas-Martínez S, Penas A, Díaz TE. 2004. Data from “Bioclimatic map of  
615 Europe – Thermoclimatic belts.” Cartographic Service, University of León.

- 616 Retrieved February 1, 2016, from  
617 [http://www.globalbioclimatics.org/form/tb\\_map/MS30W180.htm](http://www.globalbioclimatics.org/form/tb_map/MS30W180.htm).
- 618 33. Oliveira M, Cabral R. 1942. Doenças bacterianas das plantas diagnosticadas em  
619 Portugal. *Revista Agronómica* XXX:176-184.
- 620 34. Parkinson N, Aritua V, Heeney J, Cowie C, Bew J, Stead D. 2007. Phylogenetic  
621 analysis of *Xanthomonas* species by comparison of partial gyrase B gene  
622 sequences. *Int J Syst Evol Microbiol* 57:2881-2887.
- 623 35. Young JM, Park DC, Shearman HM, Fargier E. 2008. A multilocus sequence  
624 analysis of the genus *Xanthomonas*. *Syst Appl Microbiol* 31:366-377.
- 625 36. Pereira UP, Gouran H, Nascimento R, Adaskaveg JE, Goulart LR, Dandekar  
626 AM. 2015. Complete genome sequence of *Xanthomonas arboricola* pv.  
627 *juglandis* 417, a copper-resistant strain isolated from *Juglans regia* L. *Genome*  
628 *Announc* 3:e01126-15.
- 629 37. Cesbron S, Briand M, Essakhi S, Gironde S, Boureau T, Manceau C, Fischer-Le  
630 Saux M, Jacques MA. 2015. Comparative genomics of pathogenic and  
631 nonpathogenic strains of *Xanthomonas arboricola* unveil molecular and  
632 evolutionary events linked to pathoadaptation. *Front Plant Sci* 6:1126.
- 633 38. Higuera G, Gonzalez-Escalona N, Veliz C, Vera F, Romero J. 2015. Draft  
634 genome sequences of four *Xanthomonas arboricola* pv. *juglandis* strains  
635 associated with walnut blight in Chile. *Genome Announc* 3:e01160-15.
- 636 39. Belisario A, Maccaroni M, Corazza L, Balmas V, Valier A. 2002. Occurrence  
637 and etiology of brown apical necrosis on Persian (English) walnut fruit. *Plant*  
638 *Dis* 86:599-602.
- 639 40. Kumar S, Stecher G, Tamura K. 2016. MEGA7: Molecular Evolutionary  
640 Genetics Analysis version 7.0 for bigger datasets. *Mol Biol Evol* 33:1870-4.

- 641 41. International Seed Testing Association. 1999. International rules for seed testing  
642 rules 1999. *Seed Science & Technology* 27 supplement.
- 643 42. Lelliott RA, Stead DE. 1987. Methods for the diagnosis of bacterial diseases of  
644 plants. In *Methods in Plant Pathology*, vol 2, Preece Series, British Society of  
645 Plant Pathology, Blackwell Scientific Publications, Oxford, UK.

646 **Figure legends**

647 **FIG 1** MLSA analysis and dot blot genotyping coupled with metadata including geographic  
648 locations, bioclimatic regions, and walnut host organs for the 131 *Xanthomonas* walnut  
649 isolates used in this work. The Maximum Likelihood tree was based on the nucleotide  
650 alignments of 252 concatenated sequences (2774 bp) of *acnB*, *gyrB*, *fyuA* and *rpoD* genes,  
651 using the General Time Reversible (GTR+G+I) model. Bootstrap values higher than 50 are  
652 shown. The tree was edited using MEGA 7.0 (40) and the principal results are showed.  
653 Distinct MLSA clusters (I to X) of *Xanthomonas* isolates are highlighted with different  
654 colours. For all the isolates, the respective hybridization patterns (HP0 to HP19) is shown,  
655 as well as the plant organ from which they were isolated. The map in the centre highlights  
656 the fourteen geographic locations sampled, and details the respective thermoclimatic  
657 classification: Mt – mesotemperature; Mm – mesomediterranean; Sm –  
658 supramediterranean; Tm – thermomediterranean (32). The coloured pie charts indicate the  
659 prevalence of MLSA clusters and identifies the different hybridization patterns (HP) for  
660 each sampled region.

661 **FIG 2** Dot blot matrix summarizing the 18 different hybridization patterns (HP0 to HP19)  
662 obtained with the 131 isolates using nine *Xanthomonas arboricola* pv. *juglandis* specific  
663 markers (XAJ1 to XAJ9). Strain LMG 751 was used as positive control for all dot blot  
664 assays.

665 **FIG 3** Schematic representation of co-colonization (highlighted by circles) by different  
666 xanthomonads lineages assigned to different colours on leaves of 22 walnut specimens (Jr#)  
667 during the sampling period (2014 – 2016). Lin1 to Lin13 correspond to *Xaj* isolates. Lin21  
668 to Lin26 correspond to non-*arboricola* *Xanthomonas* sp. isolates.

669 **FIG 4** Dot blot matrix reporting the presence/absence of four type three effector genes  
670 (*T3E* - *xopR*, *avrBs2*, *xopF1* and *xopN*) in *Xanthomonas* strains and isolates representing  
671 the ten MLSA clusters (I to X) and the 18 hybridization patterns (HP0 to HP19). Black  
672 circles represent positive dot blot hybridization to the target gene and white circles  
673 represent negative dot blot hybridization to the target gene. Sixteen isolates belonging to  
674 MLSA clusters I to VI and all isolates grouped in MLSA clusters VII to X were screened.  
675 *Xanthomonas arboricola* pv. *juglandis* (*Xaj*) reference strains LMG 751, LMG 747, CFBP  
676 176 and *Xanthomonas arboricola* CFBP 1022 were used as controls (highlighted with +).  
677 Dot blot images are supplied in Fig. S1 in the supplemental material. For comparison, the  
678 distribution of *xopR*, *avrBs2*, *xopF1* and *xopN* genes, described by Essakhi et al. (20) for six  
679 strains is highlighted with an asterisk (\*), including two *Xaj* strains (CFBP 2528 and CFBP  
680 7179) and four strains isolated from walnut and belonging to three nonpathogenic groups  
681 (NP1 – strains CFBP 1022, CFBP 7629; NP2 – strain CFBP 7631; and NP3 – strain CFBP  
682 7645).

683 **FIG 5** Pathogenicity assays showing symptoms on walnut leaves developed four weeks  
684 after inoculation. LMG 747 and CPBF 1480 (MLSA cluster I and HP1) were used as  
685 positive controls. Walnut leaves inoculated with strain CPBF 424 (MLSA cluster X)  
686 showed similar bacterial necrotic spots as the positive controls. No symptoms were  
687 observed for *X. arboricola* isolates CPBF 75, CPBF 367, CPBF 1488 (MLSA cluster X)  
688 and for CPBF 1514 (MLSA cluster IX) (data not shown).

**TABLE 1** Walnut trees included in this study and the correspondent epidemiological information and molecular results obtained.

| Tree  | Host plant                          | Geographic areas<br>(bioclimatic regions <sup>a</sup> ) | Year | Plant<br>samples | CPBF <sup>b</sup><br>isolates | MLSA | HP   | Lineage |
|-------|-------------------------------------|---------------------------------------------------------|------|------------------|-------------------------------|------|------|---------|
| Jr#01 | <i>Juglans regia</i>                | Azeitão (Tm)                                            | 2009 | Leaves           | 1271                          | V    | HP10 | Lin12   |
|       |                                     |                                                         | 2014 | Leaves           | 1479                          | I    | HP1  | Lin01   |
|       |                                     |                                                         | 2014 | Fruits           | 1480                          | I    | HP1  | Lin01   |
|       |                                     |                                                         | 2016 | Buds             | 374                           | I    | HP1  | Lin01   |
| Jr#02 | <i>Juglans regia</i> cv. Amigo      | Alcobaça (Sm)                                           | 2014 | Leaves           | 413                           | V    | HP10 | Lin12   |
|       |                                     |                                                         |      | Fruits           | 1481                          | VI   | HP8  | Lin17   |
|       |                                     |                                                         |      | Branches         | 1482                          | V    | HP10 | Lin12   |
| Jr#03 | <i>Juglans regia</i> cv. Hartley    | Alcobaça (Sm)                                           | 2014 | Leaves           | 1483                          | VI   | HP8  | Lin17   |
|       |                                     |                                                         |      | Fruits           | 1484                          | VI   | HP8  | Lin17   |
|       |                                     |                                                         |      | Leaves           | 1485                          | VI   | HP8  | Lin17   |
| Jr#04 | <i>Juglans regia</i> cv. Lara       | Alcobaça (Sm)                                           | 2014 | Leaves           | 1550                          | V    | HP10 | Lin12   |
|       |                                     |                                                         |      | Leaves           | 1486                          | VI   | HP8  | Lin17   |
| Jr#05 | <i>Juglans regia</i> cv. Franquette | Alcobaça (Sm)                                           | 2014 | Leaves           | 1487                          | VI   | HP8  | Lin17   |
| Jr#06 | <i>Juglans regia</i> cv. Serr       | Alcobaça (Sm)                                           | 2014 | Fruits           | 1496                          | VI   | HP8  | Lin17   |
|       |                                     |                                                         |      | Leaves           | 1488                          | X    | HP0  | Lin24   |
|       |                                     |                                                         |      | Leaves           | 1553                          | VI   | HP8  | Lin17   |
| Jr#07 | <i>Juglans regia</i> cv. Rego       | Alcobaça (Sm)                                           | 2014 | Leaves           | 713                           | V    | HP10 | Lin12   |
|       |                                     |                                                         |      | Fruits           | 1489                          | III  | HP4  | Lin09   |
|       |                                     |                                                         |      | Fruits           | 1490                          | III  | HP4  | Lin09   |
| Jr#08 | <i>Juglans regia</i> cv. Corne      | Alcobaça (Sm)                                           | 2014 | Leaves           | 1497                          | IV   | HP10 | Lin11   |
|       |                                     |                                                         |      | Fruits           | 1491                          | III  | HP4  | Lin09   |
| Jr#09 | <i>Juglans regia</i> cv. Amigo      | Alcobaça (Sm)                                           | 2014 | Leaves           | 1492                          | III  | HP4  | Lin09   |
| Jr#10 | <i>Juglans regia</i> cv. Hartley    | Alcobaça (Sm)                                           | 2014 | Leaves           | 1502                          | IV   | HP10 | Lin11   |
| Jr#11 | <i>Juglans regia</i>                | Seia (Mm)                                               | 2014 | Leaves           | 1504                          | I    | HP9  | Lin05   |
|       |                                     |                                                         |      | Fruits           | 1505                          | I    | HP9  | Lin05   |
| Jr#12 | <i>Juglans regia</i>                | Beja (Sm)                                               | 2014 | Leaves           | 1508                          | IX   | HP11 | Lin21   |
| Jr#13 | <i>Juglans regia</i>                | Azeitão (Tm)                                            | 2014 | Fruits           | 1510                          | V    | HP10 | Lin12   |
| Jr#14 | <i>Juglans regia</i> cv. Hartley    | Estremoz (Sm)                                           | 2014 | Leaves           | 1513                          | V    | HP10 | Lin12   |
| Jr#15 | <i>Juglans regia</i> cv. Hartley    | Estremoz (Sm)                                           | 2014 | Leaves           | 1514                          | IX   | HP11 | Lin21   |
| Jr#16 | <i>Juglans regia</i> cv. Cisco      | Estremoz (Sm)                                           | 2014 | Leaves           | 1515                          | VIII | HP16 | Lin19   |
| Jr#17 | <i>Juglans regia</i> cv. Tulane     | Estremoz (Sm)                                           | 2014 | Leaves           | 1520                          | I    | HP2  | Lin03   |
| Jr#18 | <i>Juglans regia</i>                | Loures (Sm)                                             | 2014 | Leaves           | 1521                          | VI   | HP5  | Lin14   |
|       |                                     |                                                         |      | Leaves           | 1586                          | VIII | HP16 | Lin20   |
|       |                                     |                                                         |      | Fruits           | 1583                          | VI   | HP5  | Lin14   |
|       |                                     |                                                         |      | Fruits           | 1584                          | VI   | HP5  | Lin14   |
|       |                                     |                                                         |      | Buds             | 414                           | X    | HP18 | Lin31   |
|       |                                     |                                                         | 2016 | Buds             | 427                           | VI   | HP5  | Lin14   |
|       |                                     |                                                         |      | Buds             | 367                           | X    | HP18 | Lin31   |
|       |                                     |                                                         |      | Buds             | 424                           | X    | HP17 | Lin30   |
|       |                                     |                                                         |      | Buds             | 426                           | X    | HP0  | Lin25   |
|       |                                     |                                                         |      | Leaves           | 1522                          | IX   | HP11 | Lin21   |
| Jr#19 | <i>Juglans regia</i> cv. Howard     | Estremoz (Sm)                                           | 2014 | Leaves           | 1525                          | V    | HP10 | Lin12   |
| Jr#20 | <i>Juglans regia</i> cv. Lara       | Estremoz (Sm)                                           | 2014 | Leaves           | 1527                          | V    | HP10 | Lin12   |
| Jr#21 | <i>Juglans regia</i> cv. Lara       | Estremoz (Sm)                                           | 2014 | Leaves           | 1530                          | VIII | HP16 | Lin19   |
| Jr#22 | <i>Juglans regia</i> cv. Pedro      | Estremoz (Sm)                                           | 2014 | Leaves           | 1532                          | VI   | HP6  | Lin15   |
| Jr#23 | <i>Juglans regia</i>                | Portimão (Tm)                                           | 2015 | Fruits           | 1537                          | VI   | HP5  | Lin14   |
| Jr#24 | <i>Juglans regia</i>                | Portimão (Tm)                                           | 2015 | Leaves           | 1543                          | V    | HP10 | Lin12   |
| Jr#25 | <i>Juglans regia</i> cv. Amigo      | Alcobaça (Sm)                                           | 2015 | Leaves           | 1547                          | III  | HP4  | Lin09   |
| Jr#26 | <i>Juglans regia</i> cv. Hartley    | Alcobaça (Sm)                                           | 2015 | Leaves           | 1545                          | III  | HP4  | Lin09   |
|       |                                     |                                                         |      | Fruits           | 742                           | III  | HP4  | Lin09   |
|       |                                     |                                                         |      | Fruits           | 745                           | I    | HP1  | Lin01   |
|       |                                     |                                                         |      | Fruits           | 747                           | III  | HP4  | Lin09   |
|       |                                     |                                                         |      | Fruits           | 749                           | I    | HP1  | Lin01   |
|       |                                     |                                                         |      | Fruits           | 1556                          | V    | HP10 | Lin12   |
|       |                                     |                                                         |      | Fruits           | 1559                          | III  | HP4  | Lin09   |
| Jr#27 | <i>Juglans regia</i> cv. Hartley    | Alcobaça (Sm)                                           | 2015 | Fruits           | 1554                          | V    | HP10 | Lin12   |

**TABLE 1** (continued)

| Tree  | Host plant                                 | Geographic areas<br>(bioclimatic regions <sup>a</sup> ) | Year | Plant<br>samples | CPBF <sup>b</sup><br>isolates | MLSA | HP   | Lineage |
|-------|--------------------------------------------|---------------------------------------------------------|------|------------------|-------------------------------|------|------|---------|
| Jr#27 | <i>Juglans regia</i> cv. Hartley           | Alcobaça (Sm)                                           | 2016 | Leaves           | 750                           | V    | HP10 | Lin12   |
|       |                                            |                                                         |      |                  | 753                           | I    | HP1  | Lin01   |
| Jr#28 | <i>Juglans regia</i>                       | Bombarral (Sm)                                          | 2015 | Fruits           | 755                           | IV   | HP10 | Lin11   |
|       |                                            |                                                         |      | Leaves           | 1561                          | V    | HP10 | Lin12   |
| Jr#29 | <i>Juglans regia</i> cv. Chandler          | Bombarral (Sm)                                          | 2015 | Leaves           | 1562                          | I    | HP1  | Lin01   |
| Jr#30 | <i>Juglans regia</i> cv. Chandler          | Bombarral (Sm)                                          | 2015 | Leaves           | 1565                          | II   | HP3  | Lin07   |
| Jr#31 | <i>Juglans regia</i> cv. Chandler          | Bombarral (Sm)                                          | 2015 | Fruits           | 1569                          | II   | HP3  | Lin07   |
| Jr#32 | <i>Juglans regia</i> cv. Chandler          | Bombarral (Sm)                                          | 2015 | Leaves           | 1567                          | I    | HP13 | Lin02   |
| Jr#33 | <i>Juglans regia</i>                       | Bombarral (Sm)                                          | 2015 | Leaves           | 1570                          | I    | HP2  | Lin03   |
| Jr#34 | <i>Juglans regia</i>                       | Bombarral (Sm)                                          | 2015 | Leaves           | 1574                          | I    | HP13 | Lin02   |
| Jr#35 | <i>Juglans regia</i>                       | Guarda (Mm)                                             | 2015 | Fruits           | 1575                          | II   | HP3  | Lin07   |
| Jr#36 | <i>Juglans regia</i>                       | Loures (Sm)                                             | 2015 | Leaves           | 1576                          | I    | HP1  | Lin01   |
| Jr#37 | <i>Juglans regia</i>                       | Loures (Sm)                                             | 2015 | Buds             | 1580                          | VI   | HP5  | Lin14   |
| Jr#38 | <i>Juglans regia</i>                       | Loures (Sm)                                             | 2015 | Catkins          | 78                            | X    | HP0  | Lin27   |
| Jr#39 | <i>Juglans regia</i> cv. Franquette        | Ponte da Barca (Mt)                                     | 2015 | Leaves           | 75                            | X    | HP0  | Lin28   |
| Jr#40 | <i>Juglans regia</i> cv. Franquette        | Ponte da Barca (Mt)                                     | 2015 | Leaves           | 100                           | II   | HP3  | Lin07   |
| Jr#41 | <i>Juglans regia</i> cv. Franquette        | Ponte da Barca (Mt)                                     | 2015 | Leaves           | 97                            | V    | HP10 | Lin12   |
| Jr#42 | <i>Juglans regia</i> cv. Lara              | Ponte da Barca (Mt)                                     | 2015 | Leaves           | 98                            | IX   | HP14 | Lin22   |
| Jr#43 | <i>Juglans regia</i> cv. Lara              | Ponte da Barca (Mt)                                     | 2015 | Leaves           | 105                           | IX   | HP11 | Lin21   |
| Jr#44 | <i>Juglans regia</i> cv. Lara              | Ponte da Barca (Mt)                                     | 2015 | Leaves           | 106                           | III  | HP4  | Lin10   |
| Jr#45 | <i>Juglans regia</i> cv. Lara              | Ponte da Barca (Mt)                                     | 2015 | Leaves           | 108                           | IX   | HP15 | Lin23   |
| Jr#46 | <i>Juglans regia</i> cv. Lara              | Ponte da Barca (Mt)                                     | 2015 | Leaves           | 109                           | III  | HP4  | Lin10   |
| Jr#47 | <i>Juglans regia</i> cv. Lara              | Ponte da Barca (Mt)                                     | 2015 | Leaves           | 110                           | II   | HP3  | Lin07   |
| Jr#48 | <i>Juglans regia</i> cv. Lara              | Ponte da Barca (Mt)                                     | 2015 | Leaves           | 112                           | III  | HP4  | Lin09   |
| Jr#49 | <i>Juglans regia</i> cv. Lara              | Ponte da Barca (Mt)                                     | 2015 | Leaves           | 122                           | VII  | HP0  | Lin18   |
| Jr#50 | <i>Juglans regia</i> cv. Lara              | Ponte de Lima (Mt)                                      | 2015 | Leaves           | 228                           | III  | HP2  | Lin08   |
| Jr#51 | <i>Juglans regia</i> cv. Lara              | Ponte de Lima (Mt)                                      | 2015 | Leaves           | 237                           | III  | HP2  | Lin08   |
| Jr#52 | <i>Juglans regia</i> cv. Franquette        | Ponte de Lima (Mt)                                      | 2015 | Leaves           | 245                           | I    | HP1  | Lin01   |
| Jr#53 | <i>Juglans regia</i>                       | Loures (Sm)                                             | 2015 | Leaves           | 268                           | X    | HP17 | Lin29   |
| Jr#54 | <i>Juglans regia</i>                       | Carrazeda de Ansiães (Mm)                               | 2016 | Leaves           | 268                           | X    | HP17 | Lin29   |
| Jr#55 | <i>Juglans regia</i>                       | Carrazeda de Ansiães (Mm)                               | 2016 | Leaves           | 530                           | IV   | HP10 | Lin11   |
| Jr#56 | <i>Juglans regia</i>                       | Carrazeda de Ansiães (Mm)                               | 2016 | Leaves           | 540                           | IV   | HP10 | Lin11   |
| Jr#57 | <i>Juglans regia</i>                       | Carrazeda de Ansiães (Mm)                               | 2016 | Branches         | 554                           | V    | HP10 | Lin12   |
| Jr#58 | <i>Juglans regia</i>                       | Carrazeda de Ansiães (Mm)                               | 2016 | Leaves           | 560                           | I    | HP9  | Lin05   |
| Jr#59 | <i>Juglans regia</i>                       | Carrazeda de Ansiães (Mm)                               | 2016 | Leaves           | 561                           | V    | HP10 | Lin12   |
| Jr#60 | <i>Juglans regia</i>                       | Carrazeda de Ansiães (Mm)                               | 2016 | Leaves           | 565                           | I    | HP9  | Lin05   |
| Jr#61 | <i>Juglans regia</i>                       | Carrazeda de Ansiães (Mm)                               | 2016 | Branches         | 567                           | I    | HP9  | Lin05   |
| Jr#62 | <i>Juglans regia</i>                       | Carrazeda de Ansiães (Mm)                               | 2016 | Leaves           | 575                           | VI   | HP6  | Lin16   |
| Jr#63 | <i>Juglans regia</i>                       | Carrazeda de Ansiães (Mm)                               | 2016 | Leaves           | 576                           | V    | HP10 | Lin12   |
| Jr#64 | <i>Juglans regia</i>                       | Carrazeda de Ansiães (Mm)                               | 2016 | Leaves           | 578                           | I    | HP1  | Lin01   |
| Jr#65 | <i>Juglans regia</i>                       | Carrazeda de Ansiães (Mm)                               | 2016 | Leaves           | 578                           | I    | HP1  | Lin01   |
| Jr#66 | <i>Juglans regia</i>                       | Carrazeda de Ansiães (Mm)                               | 2016 | Leaves           | 598                           | V    | HP6  | Lin13   |
| Jr#67 | <i>Juglans regia</i>                       | Carrazeda de Ansiães (Mm)                               | 2016 | Leaves           | 601                           | I    | HP1  | Lin01   |
| Jr#68 | <i>Juglans regia</i>                       | Carrazeda de Ansiães (Mm)                               | 2016 | Leaves           | 606                           | X    | HP0  | Lin26   |
| Jr#69 | <i>Juglans regia</i>                       | Carrazeda de Ansiães (Mm)                               | 2016 | Leaves           | 624                           | V    | HP10 | Lin12   |
| Jr#70 | <i>Juglans regia</i>                       | Carrazeda de Ansiães (Mm)                               | 2016 | Leaves           | 635                           | I    | HP2  | Lin03   |
| Jr#71 | <i>Juglans regia</i>                       | Carrazeda de Ansiães (Mm)                               | 2016 | Leaves           | 647                           | I    | HP2  | Lin03   |
| Jr#72 | <i>Juglans regia</i>                       | Carrazeda de Ansiães (Mm)                               | 2016 | Leaves           | 648                           | V    | HP10 | Lin12   |
| Jr#73 | <i>Juglans regia</i>                       | Carrazeda de Ansiães (Mm)                               | 2016 | Leaves           | 655                           | I    | HP1  | Lin01   |
| Jr#74 | <i>Juglans regia</i>                       | Carrazeda de Ansiães (Mm)                               | 2016 | Leaves           | 661                           | I    | HP1  | Lin01   |
| Jr#75 | <i>Juglans regia</i>                       | Carrazeda de Ansiães (Mm)                               | 2016 | Leaves           | 663                           | V    | HP10 | Lin12   |
| Jr#76 | <i>Juglans regia</i>                       | Carrazeda de Ansiães (Mm)                               | 2016 | Leaves           | 676                           | V    | HP10 | Lin12   |
| Jr#77 | <i>Juglans regia</i>                       | Baião (Mm)                                              | 2016 | Leaves           | 685                           | V    | HP10 | Lin12   |
| Jr#78 | <i>Juglans regia</i>                       | Baião (Mm)                                              | 2016 | Leaves           | 689                           | I    | HP1  | Lin01   |
| Jr#79 | <i>Juglans regia</i>                       | Leiria (Sm)                                             | 2016 | Leaves           | 698                           | V    | HP10 | Lin12   |
| Jr#80 | <i>Juglans regia</i>                       | Leiria (Sm)                                             | 2016 | Leaves           | 705                           | I    | HP1  | Lin01   |
| Jr#81 | <i>Juglans regia</i>                       | Leiria (Sm)                                             | 2016 | Leaves           | 706                           | V    | HP10 | Lin12   |
| Jr#82 | <i>Juglans regia</i> F <sup>1</sup> hybrid | Alcobaça (Sm)                                           | 2016 | Leaves           | 775                           | II   | HP2  | Lin06   |
| Jr#83 | <i>Juglans regia</i> F <sup>1</sup> hybrid | Alcobaça (Sm)                                           | 2016 | Leaves           | 778                           | IV   | HP10 | Lin11   |
| Jr#84 | <i>Juglans regia</i> F <sup>1</sup> hybrid | Alcobaça (Sm)                                           | 2016 | Leaves           | 780                           | IV   | HP10 | Lin11   |
| Jr#85 | <i>Juglans regia</i> F <sup>1</sup> hybrid | Alcobaça (Sm)                                           | 2016 | Leaves           | 781                           | II   | HP2  | Lin06   |

**TABLE 1** (continued)

| Tree  | Host plant                                 | Geographic areas<br>(bioclimatic regions <sup>a</sup> ) | Year | Plant<br>samples | CPBF <sup>b</sup><br>isolates | MLSA | HP   | Lineage |
|-------|--------------------------------------------|---------------------------------------------------------|------|------------------|-------------------------------|------|------|---------|
| Jr#59 | <i>Juglans regia</i> F <sup>1</sup> hybrid | Alcobaça (Sm)                                           | 2016 | Leaves           | 783                           | IV   | HP10 | Lin11   |
|       |                                            |                                                         |      |                  | 784                           | I    | HP19 | Lin04   |
| Jr#60 | <i>Juglans regia</i> F <sup>1</sup> hybrid | Alcobaça (Sm)                                           | 2016 | Leaves           | 786                           | IV   | HP10 | Lin11   |
|       |                                            |                                                         |      |                  | 789                           | II   | HP2  | Lin06   |
| Jr#61 | <i>Juglans regia</i> F <sup>1</sup> hybrid | Alcobaça (Sm)                                           | 2016 | Leaves           | 793                           | IV   | HP10 | Lin11   |
|       |                                            |                                                         |      |                  | 796                           | II   | HP2  | Lin06   |
| Jr#62 | <i>Juglans regia</i> cv. <i>Sunland</i>    | Alcobaça (Sm)                                           | 2016 | Leaves           | 800                           | IV   | HP10 | Lin11   |
|       |                                            |                                                         |      |                  | 803                           | I    | HP1  | Lin01   |
| Jr#63 | <i>Juglans regia</i> cv. <i>Refoios 1</i>  | Alcobaça (Sm)                                           | 2016 | Leaves           | 805                           | II   | HP2  | Lin06   |
|       |                                            |                                                         |      |                  | 806                           | IV   | HP10 | Lin11   |
| Jr#64 | <i>Juglans regia</i> cv. <i>Refoios 2</i>  | Alcobaça (Sm)                                           | 2016 | Leaves           | 808                           | II   | HP2  | Lin06   |
|       |                                            |                                                         |      |                  | 809                           | IV   | HP10 | Lin11   |

<sup>a</sup> Mt – mesotemperature thermoclimatic region; Mm – mesomediterranean thermoclimatic region; Sm – supramediterranean thermoclimatic region; Tm – thermomediterranean thermoclimatic region (32).

<sup>b</sup> CPBF, Coleção Portuguesa de Bactérias Fitopatogénicas, Instituto Nacional de Investigação Agrária e Veterinária, Oeiras, Portugal.

F<sup>1</sup> hybrids between two walnut cultivars.

Walnut American cultivars: Amigo, Chandler, Cisco, Hartley, Howard, Pedro, Serr, Sunland, Tulane; Walnut French cultivars: Corne, Franquette, Lara; Portuguese cultivars: Refoios 1, Refoios 2, Rego.



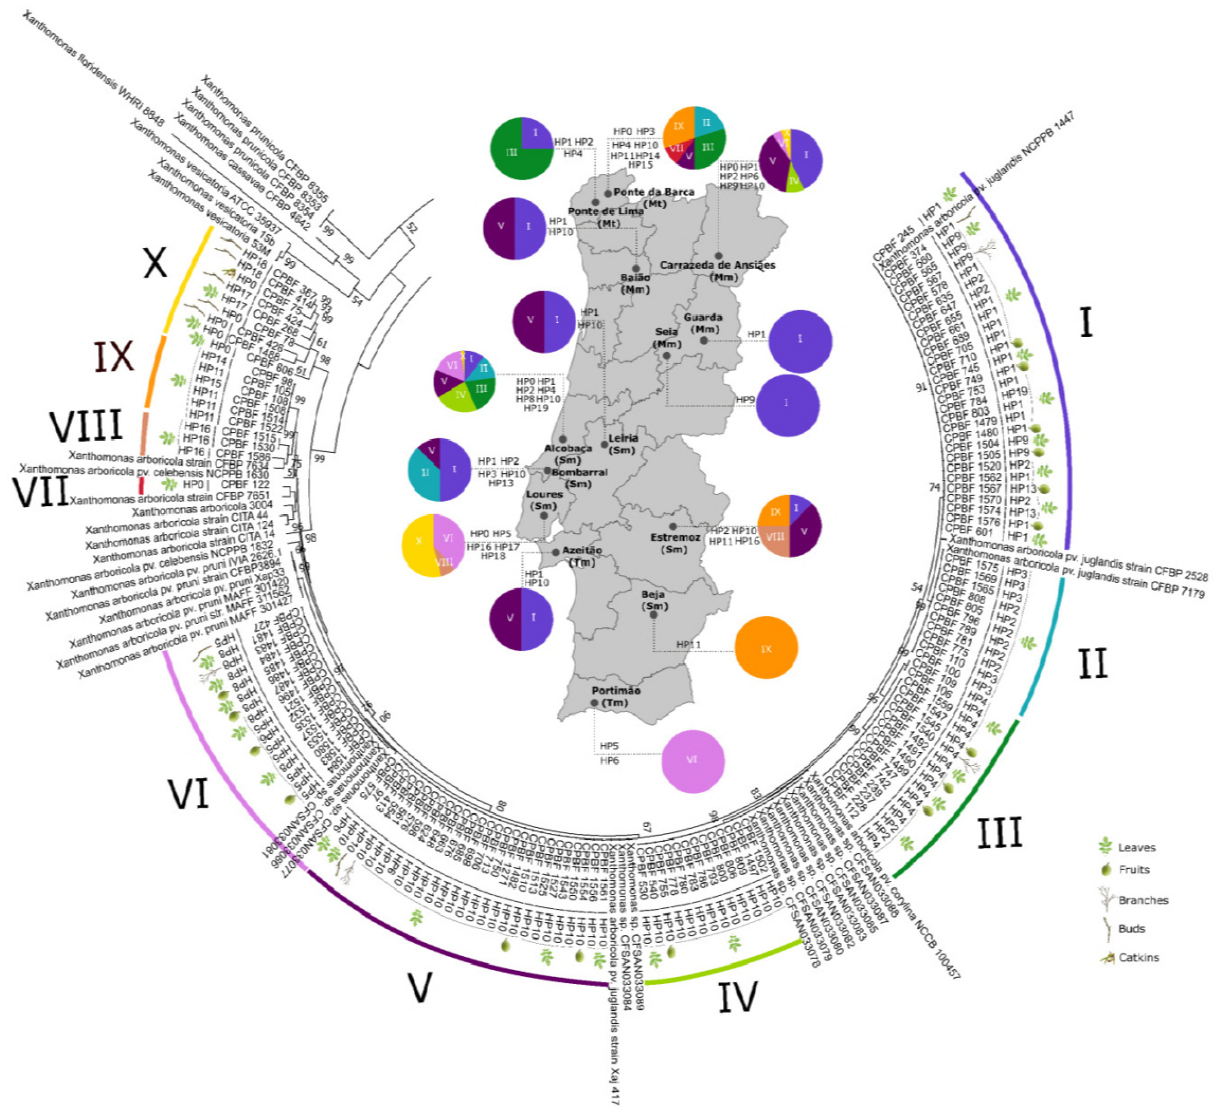

**FIG 1** MLSA analysis and dot blot genotyping coupled with metadata including geographic locations, bioclimatic regions, and walnut host organs for the 131 *Xanthomonas* walnut isolates used in this work. The Maximum Likelihood tree was based on the nucleotide alignments of 252 concatenated sequences (2774 bp) of *acnB*, *gyrB*, *fyuA* and *rpoD* genes, using the General Time Reversible (GTR+G+I) model. Bootstrap values higher than 50 are shown. The tree was edited using MEGA 7.0 (40) and the principal results are showed. Distinct MLSA clusters (I to X) of *Xanthomonas* isolates are highlighted with different colours. For all the isolates, the respective

hybridization patterns (HP0 to HP19) is shown, as well as the plant organ from which they were isolated. The map in the centre highlights the fourteen geographic locations sampled, and details the respective thermoclimatic classification: Mt – mesotemperature; Mm – mesomediterranean; Sm – supramediterranean; Tm – thermomediterranean (32). The coloured pie charts indicate the prevalence of MLSA clusters and identifies the different hybridization patterns (HP) for each sampled region.

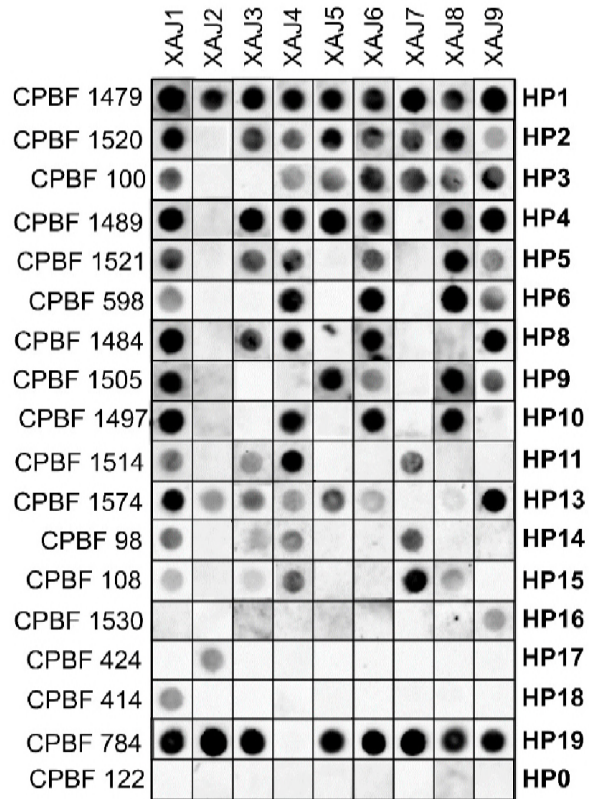

**FIG 2** Dot blot matrix summarizing the 18 different hybridization patterns (HP0 to HP19) obtained with the 131 isolates using nine *Xanthomonas arboricola* pv. *juglandis* specific markers (XAJ1 to XAJ9). Strain LMG 751 was used as positive control for all dot blot assays.

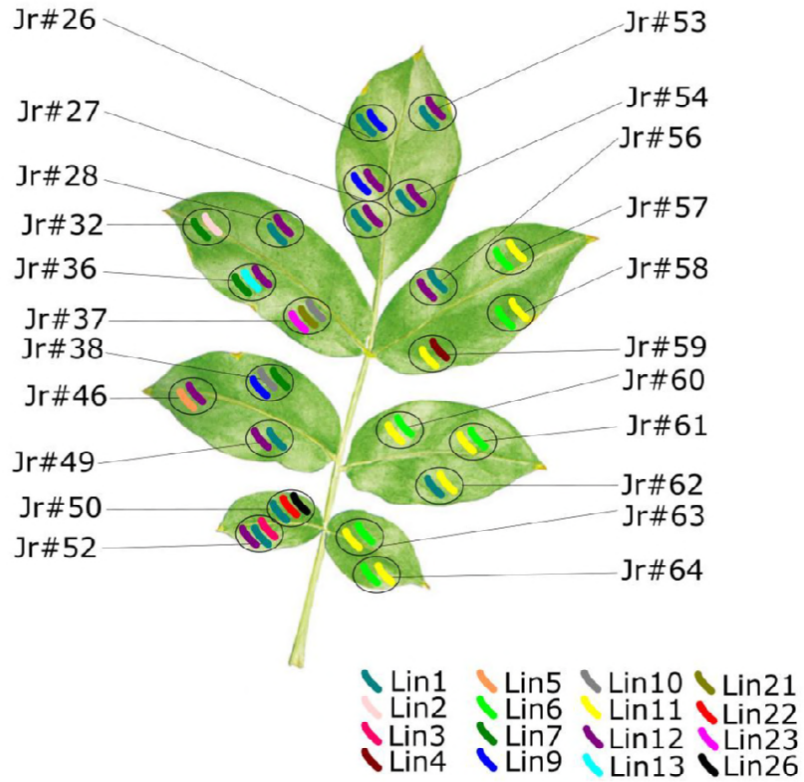

**FIG 3** Schematic representation of co-colonization (highlighted by circles) by different xanthomonads lineages assigned to different colours on leaves of 22 walnut specimens (Jr#) during the sampling period (2014 – 2016). Lin1 to Lin13 correspond to *Xaj* isolates. Lin21 to Lin26 correspond to non-*arboricola* *Xanthomonas* sp. isolates.

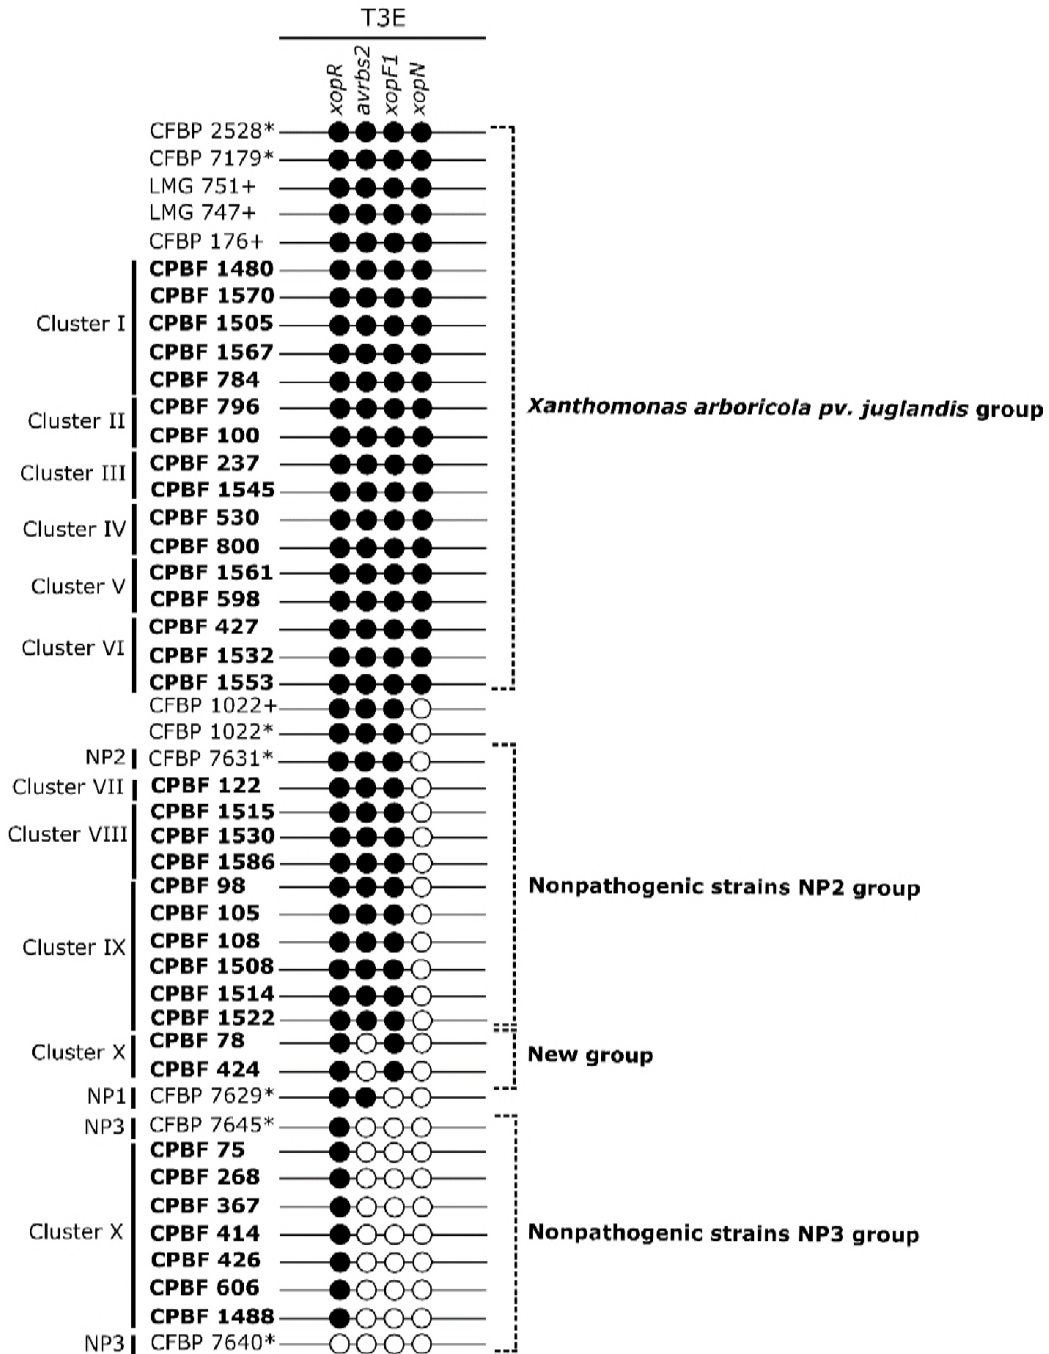

**FIG 4** Dot blot matrix reporting the presence/absence of four type three effector genes (T3E - *xopR*, *avrBs2*, *xopF1* and *xopN*) in *Xanthomonas* strains and isolates representing the ten MLSA clusters (I to X) and the 18 hybridization patterns (HP0 to HP19). Black circles represent positive dot blot hybridization to the target gene and

white circles represent negative dot blot hybridization to the target gene. Sixteen isolates belonging to MLSA clusters I to VI and all isolates grouped in MLSA clusters VII to X were screened. *Xanthomonas arboricola* pv. *juglandis* (*Xaj*) reference strains LMG 751, LMG 747, CFBP 176 and *Xanthomonas arboricola* CFBP 1022 were used as controls (highlighted with +). Dot blot images are supplied in Fig. S1 in the supplemental material. For comparison, the distribution of *xopR*, *avrBs2*, *xopF1* and *xopN* genes, described by Essakhi et al. (20) for six strains is highlighted with an asterisk (\*), including two *Xaj* strains (CFBP 2528 and CFBP 7179) and four strains isolated from walnut and belonging to three nonpathogenic groups (NP1 – strains CFBP 1022, CFBP 7629; NP2 – strain CFBP 7631; and NP3 – strain CFBP 7645).

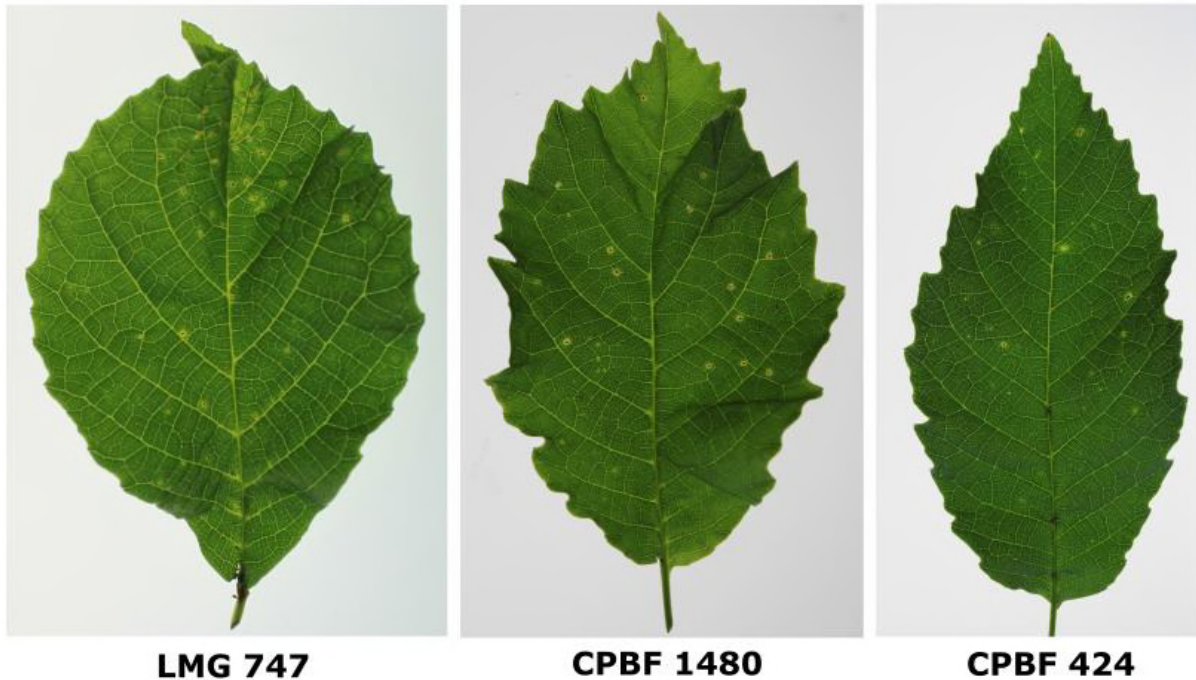

**FIG 5** Pathogenicity assays showing symptoms on walnut leaves developed four weeks after inoculation. LMG 747 and CPBF 1480 (MLSA cluster I and HP1) were used as positive controls. Walnut leaves inoculated with strain CPBF 424 (MLSA cluster X) showed similar bacterial necrotic spots as the positive controls. No symptoms were observed for *X. arboricola* isolates CPBF 75, CPBF 367, CPBF 1488 (MLSA cluster X) and for CPBF 1514 (MLSA cluster IX) (data not shown).
